# Supplementary material
Source: publisher site journal article supplement (https://www.spandidos-publications.com/1060/downloadSupplementary)
Supplement: Supplementary file 1 [file downloadSupplementary]

Table SI. Characteristics of patients with bone metastases who received radiotherapy before or after the establishment of the multidisciplinary treatment system.

| Age, years | Sex    | Primary tumor site | Period before or after the establishment of the multidisciplinary treatment system |
|------------|--------|--------------------|------------------------------------------------------------------------------------|
| 46         | Female | Bile duct          | Before                                                                             |
| 71         | Female | Bile duct          | Before                                                                             |
| 86         | Female | Bile duct          | Before                                                                             |
| 55         | Female | Bile duct          | Before                                                                             |
| 73         | Male   | Bile duct          | Before                                                                             |
| 47         | Male   | Bile duct          | Before                                                                             |
| 75         | Male   | Bile duct          | Before                                                                             |
| 56         | Female | Breast             | Before                                                                             |
| 67         | Female | Breast             | Before                                                                             |
| 55         | Female | Breast             | Before                                                                             |
| 47         | Female | Breast             | Before                                                                             |
| 54         | Female | Breast             | Before                                                                             |
| 51         | Female | Breast             | Before                                                                             |
| 67         | Female | Breast             | Before                                                                             |
| 74         | Female | Breast             | Before                                                                             |
| 34         | Female | Breast             | Before                                                                             |
| 49         | Female | Breast             | Before                                                                             |
| 60         | Female | Breast             | Before                                                                             |
| 42         | Female | Breast             | Before                                                                             |
| 66         | Female | Breast             | Before                                                                             |
| 35         | Female | Breast             | Before                                                                             |
| 58         | Female | Breast             | Before                                                                             |
| 44         | Female | Breast             | Before                                                                             |
| 48         | Female | Breast             | Before                                                                             |
| 67         | Female | Breast             | Before                                                                             |
| 71         | Female | Breast             | Before                                                                             |
| 50         | Female | Breast             | Before                                                                             |
| 65         | Female | Breast             | Before                                                                             |
| 56         | Female | Breast             | Before                                                                             |
| 53         | Female | Breast             | Before                                                                             |
| 51         | Female | Breast             | Before                                                                             |
| 55         | Female | Breast             | Before                                                                             |
| 45         | Female | Breast             | Before                                                                             |
| 59         | Female | Breast             | Before                                                                             |
| 61         | Female | Breast             | Before                                                                             |
| 56         | Female | Breast             | Before                                                                             |
| 61         | Female | Breast             | Before                                                                             |
| 64         | Female | Breast             | Before                                                                             |
| 64         | Female | Breast             | Before                                                                             |
| 72         | Female | Breast             | Before                                                                             |
| 57         | Female | Breast             | Before                                                                             |
| 62         | Female | Breast             | Before                                                                             |
| 64         | Female | Breast             | Before                                                                             |
| 60         | Female | Breast             | Before                                                                             |
| 51         | Female | Breast             | Before                                                                             |
| 73         | Female | Breast             | Before                                                                             |
| 45         | Female | Breast             | Before                                                                             |
| 50         | Female | Breast             | Before                                                                             |
| 56         | Female | Breast             | Before                                                                             |
| 52         | Female | Breast             | Before                                                                             |
| 61         | Female | Breast             | Before                                                                             |

Table SI. Continued.

| Age, years | Sex    | Primary tumor site | Period before or after the establishment of the multidisciplinary treatment system |
|------------|--------|--------------------|------------------------------------------------------------------------------------|
| 59         | Female | Breast             | Before                                                                             |
| 77         | Female | Breast             | Before                                                                             |
| 60         | Female | Breast             | Before                                                                             |
| 73         | Female | Breast             | Before                                                                             |
| 46         | Female | Breast             | Before                                                                             |
| 35         | Female | Breast             | Before                                                                             |
| 67         | Female | Breast             | Before                                                                             |
| 45         | Female | Breast             | Before                                                                             |
| 61         | Female | Breast             | Before                                                                             |
| 64         | Female | Breast             | Before                                                                             |
| 48         | Female | Breast             | Before                                                                             |
| 48         | Female | Breast             | Before                                                                             |
| 63         | Female | Breast             | Before                                                                             |
| 62         | Female | Breast             | Before                                                                             |
| 35         | Female | Breast             | Before                                                                             |
| 55         | Female | Breast             | Before                                                                             |
| 53         | Female | Breast             | Before                                                                             |
| 60         | Female | Breast             | Before                                                                             |
| 66         | Female | Breast             | Before                                                                             |
| 73         | Female | Breast             | Before                                                                             |
| 58         | Female | Breast             | Before                                                                             |
| 57         | Female | Breast             | Before                                                                             |
| 43         | Female | Breast             | Before                                                                             |
| 43         | Female | Colorectum         | Before                                                                             |
| 54         | Female | Colorectum         | Before                                                                             |
| 69         | Female | Colorectum         | Before                                                                             |
| 69         | Female | Colorectum         | Before                                                                             |
| 79         | Female | Colorectum         | Before                                                                             |
| 59         | Male   | Colorectum         | Before                                                                             |
| 79         | Male   | Colorectum         | Before                                                                             |
| 63         | Male   | Colorectum         | Before                                                                             |
| 62         | Male   | Colorectum         | Before                                                                             |
| 80         | Male   | Colorectum         | Before                                                                             |
| 30         | Male   | Colorectum         | Before                                                                             |
| 63         | Male   | Colorectum         | Before                                                                             |
| 59         | Male   | Esophagus          | Before                                                                             |
| 54         | Female | Gallbladder        | Before                                                                             |
| 54         | Female | Kidney             | Before                                                                             |
| 89         | Female | Kidney             | Before                                                                             |
| 52         | Female | Kidney             | Before                                                                             |
| 67         | Female | Kidney             | Before                                                                             |
| 66         | Male   | Kidney             | Before                                                                             |
| 73         | Male   | Kidney             | Before                                                                             |
| 45         | Male   | Kidney             | Before                                                                             |
| 58         | Male   | Kidney             | Before                                                                             |
| 58         | Male   | Kidney             | Before                                                                             |
| 49         | Male   | Kidney             | Before                                                                             |
| 81         | Male   | Kidney             | Before                                                                             |
| 66         | Female | Larynx             | Before                                                                             |
| 58         | Male   | Larynx             | Before                                                                             |
| 73         | Female | Liver              | Before                                                                             |
| 80         | Female | Liver              | Before                                                                             |
| 59         | Female | Liver              | Before                                                                             |

Table SI. Continued.

| Age,<br>years | Sex    | Primary<br>tumor<br>site | Period before or<br>after the establishment<br>of the multidisciplinary<br>treatment system |
|---------------|--------|--------------------------|---------------------------------------------------------------------------------------------|
| 52            | Female | Liver                    | Before                                                                                      |
| 64            | Female | Liver                    | Before                                                                                      |
| 70            | Male   | Liver                    | Before                                                                                      |
| 58            | Male   | Liver                    | Before                                                                                      |
| 34            | Male   | Liver                    | Before                                                                                      |
| 58            | Male   | Liver                    | Before                                                                                      |
| 67            | Male   | Liver                    | Before                                                                                      |
| 57            | Male   | Liver                    | Before                                                                                      |
| 65            | Male   | Liver                    | Before                                                                                      |
| 68            | Male   | Liver                    | Before                                                                                      |
| 64            | Male   | Liver                    | Before                                                                                      |
| 68            | Male   | Liver                    | Before                                                                                      |
| 66            | Male   | Liver                    | Before                                                                                      |
| 83            | Male   | Liver                    | Before                                                                                      |
| 69            | Female | Lung                     | Before                                                                                      |
| 80            | Female | Lung                     | Before                                                                                      |
| 62            | Female | Lung                     | Before                                                                                      |
| 74            | Female | Lung                     | Before                                                                                      |
| 57            | Female | Lung                     | Before                                                                                      |
| 65            | Female | Lung                     | Before                                                                                      |
| 59            | Female | Lung                     | Before                                                                                      |
| 65            | Female | Lung                     | Before                                                                                      |
| 76            | Female | Lung                     | Before                                                                                      |
| 56            | Female | Lung                     | Before                                                                                      |
| 74            | Female | Lung                     | Before                                                                                      |
| 75            | Female | Lung                     | Before                                                                                      |
| 55            | Female | Lung                     | Before                                                                                      |
| 42            | Female | Lung                     | Before                                                                                      |
| 59            | Female | Lung                     | Before                                                                                      |
| 53            | Female | Lung                     | Before                                                                                      |
| 63            | Female | Lung                     | Before                                                                                      |
| 57            | Female | Lung                     | Before                                                                                      |
| 82            | Female | Lung                     | Before                                                                                      |
| 67            | Female | Lung                     | Before                                                                                      |
| 68            | Female | Lung                     | Before                                                                                      |
| 70            | Female | Lung                     | Before                                                                                      |
| 82            | Female | Lung                     | Before                                                                                      |
| 67            | Female | Lung                     | Before                                                                                      |
| 30            | Female | Lung                     | Before                                                                                      |
| 77            | Female | Lung                     | Before                                                                                      |
| 70            | Female | Lung                     | Before                                                                                      |
| 60            | Female | Lung                     | Before                                                                                      |
| 77            | Female | Lung                     | Before                                                                                      |
| 76            | Female | Lung                     | Before                                                                                      |
| 63            | Female | Lung                     | Before                                                                                      |
| 75            | Female | Lung                     | Before                                                                                      |
| 80            | Female | Lung                     | Before                                                                                      |
| 66            | Female | Lung                     | Before                                                                                      |
| 32            | Male   | Lung                     | Before                                                                                      |
| 68            | Male   | Lung                     | Before                                                                                      |
| 76            | Male   | Lung                     | Before                                                                                      |
| 71            | Male   | Lung                     | Before                                                                                      |
| 76            | Male   | Lung                     | Before                                                                                      |

Table SI. Continued.

| Age,<br>years | Sex  | Primary<br>tumor<br>site | Period before or<br>after the establishment<br>of the multidisciplinary<br>treatment system |
|---------------|------|--------------------------|---------------------------------------------------------------------------------------------|
| 37            | Male | Lung                     | Before                                                                                      |
| 65            | Male | Lung                     | Before                                                                                      |
| 65            | Male | Lung                     | Before                                                                                      |
| 74            | Male | Lung                     | Before                                                                                      |
| 40            | Male | Lung                     | Before                                                                                      |
| 80            | Male | Lung                     | Before                                                                                      |
| 61            | Male | Lung                     | Before                                                                                      |
| 76            | Male | Lung                     | Before                                                                                      |
| 68            | Male | Lung                     | Before                                                                                      |
| 75            | Male | Lung                     | Before                                                                                      |
| 73            | Male | Lung                     | Before                                                                                      |
| 73            | Male | Lung                     | Before                                                                                      |
| 75            | Male | Lung                     | Before                                                                                      |
| 68            | Male | Lung                     | Before                                                                                      |
| 52            | Male | Lung                     | Before                                                                                      |
| 81            | Male | Lung                     | Before                                                                                      |
| 41            | Male | Lung                     | Before                                                                                      |
| 61            | Male | Lung                     | Before                                                                                      |
| 60            | Male | Lung                     | Before                                                                                      |
| 79            | Male | Lung                     | Before                                                                                      |
| 69            | Male | Lung                     | Before                                                                                      |
| 69            | Male | Lung                     | Before                                                                                      |
| 78            | Male | Lung                     | Before                                                                                      |
| 75            | Male | Lung                     | Before                                                                                      |
| 66            | Male | Lung                     | Before                                                                                      |
| 81            | Male | Lung                     | Before                                                                                      |
| 74            | Male | Lung                     | Before                                                                                      |
| 77            | Male | Lung                     | Before                                                                                      |
| 56            | Male | Lung                     | Before                                                                                      |
| 50            | Male | Lung                     | Before                                                                                      |
| 52            | Male | Lung                     | Before                                                                                      |
| 79            | Male | Lung                     | Before                                                                                      |
| 59            | Male | Lung                     | Before                                                                                      |
| 71            | Male | Lung                     | Before                                                                                      |
| 57            | Male | Lung                     | Before                                                                                      |
| 65            | Male | Lung                     | Before                                                                                      |
| 79            | Male | Lung                     | Before                                                                                      |
| 69            | Male | Lung                     | Before                                                                                      |
| 54            | Male | Lung                     | Before                                                                                      |
| 59            | Male | Lung                     | Before                                                                                      |
| 61            | Male | Lung                     | Before                                                                                      |
| 54            | Male | Lung                     | Before                                                                                      |
| 68            | Male | Lung                     | Before                                                                                      |
| 60            | Male | Lung                     | Before                                                                                      |
| 81            | Male | Lung                     | Before                                                                                      |
| 55            | Male | Lung                     | Before                                                                                      |
| 55            | Male | Lung                     | Before                                                                                      |
| 84            | Male | Lung                     | Before                                                                                      |
| 64            | Male | Lung                     | Before                                                                                      |
| 52            | Male | Lung                     | Before                                                                                      |
| 81            | Male | Lung                     | Before                                                                                      |
| 71            | Male | Lung                     | Before                                                                                      |
| 64            | Male | Lung                     | Before                                                                                      |

Table SI. Continued.

| Age,<br>years | Sex    | Primary<br>tumor<br>site | Period before or<br>after the establishment<br>of the multidisciplinary<br>treatment system |
|---------------|--------|--------------------------|---------------------------------------------------------------------------------------------|
| 64            | Male   | Lung                     | Before                                                                                      |
| 70            | Male   | Lung                     | Before                                                                                      |
| 78            | Male   | Lymphoma                 | Before                                                                                      |
| 80            | Female | Multiple myeloma         | Before                                                                                      |
| 64            | Male   | Multiple myeloma         | Before                                                                                      |
| 65            | Male   | Multiple myeloma         | Before                                                                                      |
| 66            | Female | Paget                    | Before                                                                                      |
| 82            | Female | Pancreas                 | Before                                                                                      |
| 73            | Female | Pancreas                 | Before                                                                                      |
| 61            | Female | Pancreas                 | Before                                                                                      |
| 52            | Female | Pancreas                 | Before                                                                                      |
| 50            | Male   | Pancreas                 | Before                                                                                      |
| 64            | Male   | Pancreas                 | Before                                                                                      |
| 60            | Male   | Pancreas                 | Before                                                                                      |
| 59            | Male   | Pancreas                 | Before                                                                                      |
| 57            | Male   | Parotid gland            | Before                                                                                      |
| 64            | Female | Pharynx                  | Before                                                                                      |
| 77            | Male   | Prostate                 | Before                                                                                      |
| 63            | Male   | Prostate                 | Before                                                                                      |
| 80            | Male   | Prostate                 | Before                                                                                      |
| 88            | Male   | Prostate                 | Before                                                                                      |
| 79            | Male   | Prostate                 | Before                                                                                      |
| 58            | Male   | Prostate                 | Before                                                                                      |
| 81            | Male   | Prostate                 | Before                                                                                      |
| 82            | Male   | Prostate                 | Before                                                                                      |
| 76            | Male   | Prostate                 | Before                                                                                      |
| 53            | Male   | Prostate                 | Before                                                                                      |
| 89            | Male   | Prostate                 | Before                                                                                      |
| 66            | Male   | Prostate                 | Before                                                                                      |
| 61            | Male   | Prostate                 | Before                                                                                      |
| 77            | Male   | Prostate                 | Before                                                                                      |
| 55            | Male   | Prostate                 | Before                                                                                      |
| 63            | Male   | Prostate                 | Before                                                                                      |
| 62            | Male   | Prostate                 | Before                                                                                      |
| 84            | Male   | Prostate                 | Before                                                                                      |
| 60            | Male   | Prostate                 | Before                                                                                      |
| 62            | Male   | Prostate                 | Before                                                                                      |
| 82            | Male   | Prostate                 | Before                                                                                      |
| 80            | Male   | Prostate                 | Before                                                                                      |
| 71            | Male   | Prostate                 | Before                                                                                      |
| 85            | Male   | Prostate                 | Before                                                                                      |
| 74            | Male   | Prostate                 | Before                                                                                      |
| 82            | Male   | Prostate                 | Before                                                                                      |
| 58            | Male   | Prostate                 | Before                                                                                      |
| 68            | Female | Sarcoma                  | Before                                                                                      |
| 76            | Male   | Sarcoma                  | Before                                                                                      |
| 78            | Male   | Sarcoma                  | Before                                                                                      |
| 50            | Male   | Sarcoma                  | Before                                                                                      |
| 69            | Female | Stomach                  | Before                                                                                      |
| 74            | Female | Stomach                  | Before                                                                                      |
| 49            | Female | Stomach                  | Before                                                                                      |
| 43            | Female | Stomach                  | Before                                                                                      |
| 48            | Female | Stomach                  | Before                                                                                      |

Table SI. Continued.

| Age,<br>years | Sex    | Primary<br>tumor<br>site | Period before or<br>after the establishment<br>of the multidisciplinary<br>treatment system |
|---------------|--------|--------------------------|---------------------------------------------------------------------------------------------|
| 47            | Female | Stomach                  | Before                                                                                      |
| 38            | Female | Stomach                  | Before                                                                                      |
| 67            | Female | Stomach                  | Before                                                                                      |
| 75            | Male   | Stomach                  | Before                                                                                      |
| 60            | Male   | Stomach                  | Before                                                                                      |
| 60            | Male   | Stomach                  | Before                                                                                      |
| 60            | Male   | Stomach                  | Before                                                                                      |
| 61            | Male   | Stomach                  | Before                                                                                      |
| 48            | Male   | Stomach                  | Before                                                                                      |
| 73            | Male   | Stomach                  | Before                                                                                      |
| 47            | Male   | Stomach                  | Before                                                                                      |
| 71            | Male   | Stomach                  | Before                                                                                      |
| 79            | Female | Thyroid                  | Before                                                                                      |
| 72            | Female | Thyroid                  | Before                                                                                      |
| 65            | Male   | Thyroid                  | Before                                                                                      |
| 55            | Male   | Thyroid                  | Before                                                                                      |
| 55            | Male   | Thyroid                  | Before                                                                                      |
| 69            | Female | Tongue                   | Before                                                                                      |
| 68            | Male   | Tongue                   | Before                                                                                      |
| 37            | Female | Uterus                   | Before                                                                                      |
| 56            | Female | Uterus                   | Before                                                                                      |
| 76            | Female | Uterus                   | Before                                                                                      |
| 84            | Female | Vulva                    | Before                                                                                      |
| 60            | Female | Bile duct                | After                                                                                       |
| 80            | Female | Bladder                  | After                                                                                       |
| 65            | Female | Breast                   | After                                                                                       |
| 76            | Female | Breast                   | After                                                                                       |
| 48            | Female | Breast                   | After                                                                                       |
| 79            | Female | Breast                   | After                                                                                       |
| 67            | Female | Breast                   | After                                                                                       |
| 58            | Female | Breast                   | After                                                                                       |
| 70            | Female | Breast                   | After                                                                                       |
| 62            | Female | Breast                   | After                                                                                       |
| 65            | Female | Breast                   | After                                                                                       |
| 57            | Female | Breast                   | After                                                                                       |
| 61            | Female | Breast                   | After                                                                                       |
| 61            | Female | Breast                   | After                                                                                       |
| 55            | Female | Breast                   | After                                                                                       |
| 62            | Female | Breast                   | After                                                                                       |
| 58            | Female | Breast                   | After                                                                                       |
| 61            | Female | Breast                   | After                                                                                       |
| 65            | Female | Breast                   | After                                                                                       |
| 55            | Female | Breast                   | After                                                                                       |
| 60            | Female | Breast                   | After                                                                                       |
| 61            | Female | Breast                   | After                                                                                       |
| 67            | Female | Breast                   | After                                                                                       |
| 52            | Female | Breast                   | After                                                                                       |
| 61            | Female | Breast                   | After                                                                                       |
| 33            | Female | Breast                   | After                                                                                       |
| 65            | Female | Breast                   | After                                                                                       |
| 57            | Female | Breast                   | After                                                                                       |
| 68            | Female | Breast                   | After                                                                                       |
| 48            | Female | Breast                   | After                                                                                       |

Table SI. Continued.

| Age,<br>years | Sex    | Primary<br>tumor<br>site | Period before or<br>after the establishment<br>of the multidisciplinary<br>treatment system |
|---------------|--------|--------------------------|---------------------------------------------------------------------------------------------|
| 67            | Female | Breast                   | After                                                                                       |
| 78            | Female | Breast                   | After                                                                                       |
| 70            | Female | Breast                   | After                                                                                       |
| 50            | Female | Breast                   | After                                                                                       |
| 61            | Female | Breast                   | After                                                                                       |
| 72            | Female | Breast                   | After                                                                                       |
| 56            | Female | Breast                   | After                                                                                       |
| 59            | Female | Breast                   | After                                                                                       |
| 73            | Female | Breast                   | After                                                                                       |
| 59            | Female | Breast                   | After                                                                                       |
| 50            | Female | Breast                   | After                                                                                       |
| 68            | Female | Breast                   | After                                                                                       |
| 55            | Female | Breast                   | After                                                                                       |
| 68            | Female | Breast                   | After                                                                                       |
| 62            | Female | Breast                   | After                                                                                       |
| 56            | Female | Breast                   | After                                                                                       |
| 62            | Female | Breast                   | After                                                                                       |
| 83            | Female | Breast                   | After                                                                                       |
| 70            | Female | Colorectum               | After                                                                                       |
| 72            | Female | Colorectum               | After                                                                                       |
| 77            | Female | Colorectum               | After                                                                                       |
| 55            | Female | Colorectum               | After                                                                                       |
| 77            | Female | Colorectum               | After                                                                                       |
| 76            | Female | Colorectum               | After                                                                                       |
| 69            | Female | Colorectum               | After                                                                                       |
| 72            | Male   | Colorectum               | After                                                                                       |
| 62            | Male   | Colorectum               | After                                                                                       |
| 56            | Male   | Colorectum               | After                                                                                       |
| 56            | Male   | Colorectum               | After                                                                                       |
| 58            | Male   | Colorectum               | After                                                                                       |
| 61            | Male   | Colorectum               | After                                                                                       |
| 59            | Female | Esophagus                | After                                                                                       |
| 61            | Female | Esophagus                | After                                                                                       |
| 25            | Male   | Esophagus                | After                                                                                       |
| 75            | Female | Kidney                   | After                                                                                       |
| 75            | Female | Kidney                   | After                                                                                       |
| 57            | Male   | Kidney                   | After                                                                                       |
| 66            | Male   | Kidney                   | After                                                                                       |
| 69            | Male   | Kidney                   | After                                                                                       |
| 56            | Male   | Kidney                   | After                                                                                       |
| 71            | Male   | Larynx                   | After                                                                                       |
| 64            | Female | Liver                    | After                                                                                       |
| 64            | Male   | Liver                    | After                                                                                       |
| 69            | Male   | Liver                    | After                                                                                       |
| 61            | Male   | Liver                    | After                                                                                       |
| 56            | Male   | Liver                    | After                                                                                       |
| 67            | Male   | Liver                    | After                                                                                       |
| 71            | Female | Lung                     | After                                                                                       |
| 66            | Female | Lung                     | After                                                                                       |
| 62            | Female | Lung                     | After                                                                                       |
| 71            | Female | Lung                     | After                                                                                       |
| 77            | Female | Lung                     | After                                                                                       |
| 68            | Female | Lung                     | After                                                                                       |

Table SI. Continued.

| Age,<br>years | Sex    | Primary<br>tumor<br>site | Period before or<br>after the establishment<br>of the multidisciplinary<br>treatment system |
|---------------|--------|--------------------------|---------------------------------------------------------------------------------------------|
| 27            | Female | Lung                     | After                                                                                       |
| 59            | Female | Lung                     | After                                                                                       |
| 74            | Female | Lung                     | After                                                                                       |
| 63            | Female | Lung                     | After                                                                                       |
| 77            | Female | Lung                     | After                                                                                       |
| 61            | Female | Lung                     | After                                                                                       |
| 66            | Female | Lung                     | After                                                                                       |
| 61            | Female | Lung                     | After                                                                                       |
| 60            | Female | Lung                     | After                                                                                       |
| 83            | Female | Lung                     | After                                                                                       |
| 66            | Female | Lung                     | After                                                                                       |
| 59            | Female | Lung                     | After                                                                                       |
| 51            | Female | Lung                     | After                                                                                       |
| 62            | Female | Lung                     | After                                                                                       |
| 85            | Female | Lung                     | After                                                                                       |
| 58            | Female | Lung                     | After                                                                                       |
| 88            | Female | Lung                     | After                                                                                       |
| 49            | Female | Lung                     | After                                                                                       |
| 86            | Female | Lung                     | After                                                                                       |
| 70            | Female | Lung                     | After                                                                                       |
| 72            | Female | Lung                     | After                                                                                       |
| 78            | Male   | Lung                     | After                                                                                       |
| 71            | Male   | Lung                     | After                                                                                       |
| 73            | Male   | Lung                     | After                                                                                       |
| 84            | Male   | Lung                     | After                                                                                       |
| 52            | Male   | Lung                     | After                                                                                       |
| 71            | Male   | Lung                     | After                                                                                       |
| 67            | Male   | Lung                     | After                                                                                       |
| 49            | Male   | Lung                     | After                                                                                       |
| 76            | Male   | Lung                     | After                                                                                       |
| 56            | Male   | Lung                     | After                                                                                       |
| 62            | Male   | Lung                     | After                                                                                       |
| 71            | Male   | Lung                     | After                                                                                       |
| 79            | Male   | Lung                     | After                                                                                       |
| 85            | Male   | Lung                     | After                                                                                       |
| 66            | Male   | Lung                     | After                                                                                       |
| 67            | Male   | Lung                     | After                                                                                       |
| 51            | Male   | Lung                     | After                                                                                       |
| 70            | Male   | Lung                     | After                                                                                       |
| 78            | Male   | Lung                     | After                                                                                       |
| 60            | Male   | Lung                     | After                                                                                       |
| 52            | Male   | Lung                     | After                                                                                       |
| 65            | Male   | Lung                     | After                                                                                       |
| 77            | Male   | Lung                     | After                                                                                       |
| 60            | Male   | Lung                     | After                                                                                       |
| 74            | Male   | Lung                     | After                                                                                       |
| 64            | Male   | Lung                     | After                                                                                       |
| 67            | Male   | Lung                     | After                                                                                       |
| 67            | Male   | Lung                     | After                                                                                       |
| 59            | Male   | Lung                     | After                                                                                       |
| 40            | Male   | Lung                     | After                                                                                       |
| 53            | Male   | Lung                     | After                                                                                       |
| 84            | Male   | Lung                     | After                                                                                       |

Table SI. Continued.

| Age,<br>years | Sex    | Primary<br>tumor<br>site | Period before or<br>after the establishment<br>of the multidisciplinary<br>treatment system |
|---------------|--------|--------------------------|---------------------------------------------------------------------------------------------|
| 71            | Male   | Lung                     | After                                                                                       |
| 76            | Male   | Lung                     | After                                                                                       |
| 50            | Male   | Lung                     | After                                                                                       |
| 83            | Male   | Lung                     | After                                                                                       |
| 78            | Male   | Lung                     | After                                                                                       |
|               | Male   | Lung                     | After                                                                                       |
| 67            | Female | Malignant melanoma       | After                                                                                       |
| 69            | Male   | Mesothelioma             | After                                                                                       |
| 78            | Female | Multiple myeloma         | After                                                                                       |
| 67            | Male   | Multiple myeloma         | After                                                                                       |
| 55            | Female | Paget                    | After                                                                                       |
| 68            | Female | Pancreas                 | After                                                                                       |
| 83            | Female | Pancreas                 | After                                                                                       |
| 76            | Male   | Pancreas                 | After                                                                                       |
| 78            | Male   | Pharynx                  | After                                                                                       |
| 66            | Male   | Primary unknown          | After                                                                                       |
| 54            | Male   | Primary unknown          | After                                                                                       |
| 74            | Male   | Primary unknown          | After                                                                                       |
| 66            | Male   | Primary unknown          | After                                                                                       |
| 80            | Male   | Prostate                 | After                                                                                       |
| 62            | Male   | Prostate                 | After                                                                                       |
| 90            | Male   | Prostate                 | After                                                                                       |
| 78            | Male   | Prostate                 | After                                                                                       |
| 69            | Male   | Prostate                 | After                                                                                       |
| 67            | Male   | Prostate                 | After                                                                                       |
| 73            | Male   | Prostate                 | After                                                                                       |
| 90            | Male   | Prostate                 | After                                                                                       |
| 83            | Male   | Prostate                 | After                                                                                       |
| 61            | Male   | Prostate                 | After                                                                                       |
| 80            | Male   | Prostate                 | After                                                                                       |
| 66            | Male   | Prostate                 | After                                                                                       |
| 73            | Male   | Prostate                 | After                                                                                       |
| 76            | Male   | Prostate                 | After                                                                                       |
| 63            | Male   | Prostate                 | After                                                                                       |
| 61            | Male   | Prostate                 | After                                                                                       |
| 79            | Male   | Prostate                 | After                                                                                       |
| 62            | Male   | Prostate                 | After                                                                                       |
| 77            | Male   | Prostate                 | After                                                                                       |
| 72            | Male   | Prostate                 | After                                                                                       |
| 67            | Male   | Prostate                 | After                                                                                       |
| 73            | Male   | Prostate                 | After                                                                                       |
| 83            | Male   | Prostate                 | After                                                                                       |
| 71            | Male   | Prostate                 | After                                                                                       |
| 66            | Male   | Prostate                 | After                                                                                       |
| 66            | Male   | Prostate                 | After                                                                                       |
| 58            | Male   | Prostate                 | After                                                                                       |
| 77            | Male   | Prostate                 | After                                                                                       |
| 75            | Male   | Prostate                 | After                                                                                       |
| 72            | Male   | Prostate                 | After                                                                                       |
| 74            | Male   | Prostate                 | After                                                                                       |
| 72            | Male   | Prostate                 | After                                                                                       |
| 54            | Male   | Prostate                 | After                                                                                       |
| 87            | Male   | Prostate                 | After                                                                                       |

Table SI. Continued.

| Age,<br>years | Sex    | Primary<br>tumor<br>site | Period before or<br>after the establishment<br>of the multidisciplinary<br>treatment system |
|---------------|--------|--------------------------|---------------------------------------------------------------------------------------------|
| 76            | Female | Sarcoma                  | After                                                                                       |
| 74            | Male   | Sarcoma                  | After                                                                                       |
| 67            | Male   | Skin                     | After                                                                                       |
| 67            | Female | Stomach                  | After                                                                                       |
| 30            | Female | Stomach                  | After                                                                                       |
| 54            | Female | Stomach                  | After                                                                                       |
| 65            | Male   | Stomach                  | After                                                                                       |
| 68            | Male   | Stomach                  | After                                                                                       |
| 42            | Male   | Stomach                  | After                                                                                       |
| 63            | Male   | Stomach                  | After                                                                                       |
| 62            | Male   | Stomach                  | After                                                                                       |
| 49            | Female | Thyroid                  | After                                                                                       |
| 63            | Male   | Thyroid                  | After                                                                                       |
| 79            | Female | Tongue                   | After                                                                                       |
| 42            | Female | Uterus                   | After                                                                                       |
| 42            | Female | Uterus                   | After                                                                                       |
| 58            | Female | Uterus                   | After                                                                                       |

Table SII. Characteristics of patients with neurological deficits before or after the establishment of the multidisciplinary treatment system.

| Sex    | Age, years | Location       | Primary tumor site | Period before or after the establishment of the multidisciplinary treatment system | The interval between the recognition of neurological deficits by physicians and the start of treatment, days |                                                                                                              | Neurological deficits at the time of recognition by physicians (Frankel classification) | Neurological deficits after treatment (Frankel classification) | Referral to orthopedists before treatment | The use of BMAs before the recognition of neurological deficits by physicians |
|--------|------------|----------------|--------------------|------------------------------------------------------------------------------------|--------------------------------------------------------------------------------------------------------------|--------------------------------------------------------------------------------------------------------------|-----------------------------------------------------------------------------------------|----------------------------------------------------------------|-------------------------------------------|-------------------------------------------------------------------------------|
|        |            |                |                    |                                                                                    | The interval between the recognition of neurological deficits by physicians and the start of treatment, days | The interval between the recognition of neurological deficits by physicians and the start of treatment, days |                                                                                         |                                                                |                                           |                                                                               |
| Female | 71         | Lumbar spine   | Bile duct          | Before                                                                             | 23                                                                                                           | 24                                                                                                           | D                                                                                       | C                                                              | Yes                                       | Yes                                                                           |
| Female | 67         | Thoracic spine | Breast             | Before                                                                             | 3                                                                                                            | 6                                                                                                            | C                                                                                       | A                                                              | No                                        | No                                                                            |
| Female | 49         | Thoracic spine | Breast             | Before                                                                             | 3                                                                                                            | 4                                                                                                            | D                                                                                       | D                                                              | Yes                                       | Yes                                                                           |
| Female | 54         | Lumbar spine   | Breast             | Before                                                                             | No MRI                                                                                                       | 0                                                                                                            | D                                                                                       | D                                                              | No                                        | Yes                                                                           |
| Female | 56         | Thoracic spine | Breast             | Before                                                                             | 4                                                                                                            | 5                                                                                                            | D                                                                                       | D                                                              | Yes                                       | Yes                                                                           |
| Female | 60         | Cervical spine | Breast             | Before                                                                             | 4                                                                                                            | 13                                                                                                           | C                                                                                       | B                                                              | Yes                                       | Yes                                                                           |
| Female | 48         | Thoracic spine | Breast             | Before                                                                             | 5                                                                                                            | 1                                                                                                            | D                                                                                       | D                                                              | Yes                                       | Yes                                                                           |
| Female | 58         | Thoracic spine | Breast             | Before                                                                             | 6                                                                                                            | 7                                                                                                            | C                                                                                       | C                                                              | No                                        | Yes                                                                           |
| Female | 56         | Thoracic spine | Breast             | Before                                                                             | 13                                                                                                           | 15                                                                                                           | D                                                                                       | C                                                              | Yes                                       | No                                                                            |
| Female | 51         | Thoracic spine | Breast             | Before                                                                             | 8                                                                                                            | 10                                                                                                           | D                                                                                       | D                                                              | Yes                                       | Yes                                                                           |
| Female | 61         | Thoracic spine | Breast             | Before                                                                             | 0                                                                                                            | 0                                                                                                            | D                                                                                       | D                                                              | Yes                                       | Yes                                                                           |
| Female | 61         | Lumbar spine   | Breast             | Before                                                                             | 0                                                                                                            | 0                                                                                                            | C                                                                                       | A                                                              | Yes                                       | Yes                                                                           |
| Female | 55         | Lumbar spine   | Breast             | Before                                                                             | 0                                                                                                            | 1                                                                                                            | D                                                                                       | D                                                              | No                                        | Yes                                                                           |
| Male   | 30         | Thoracic spine | Colorectum         | Before                                                                             | 2                                                                                                            | 4                                                                                                            | B                                                                                       | B                                                              | No                                        | No                                                                            |
| Male   | 62         | Thoracic spine | Colorectum         | Before                                                                             | 0                                                                                                            | 3                                                                                                            | C                                                                                       | C                                                              | No                                        | No                                                                            |
| Male   | 63         | Thoracic spine | Colorectum         | Before                                                                             | 0                                                                                                            | 2                                                                                                            | C                                                                                       | B                                                              | No                                        | No                                                                            |
| Male   | 63         | Thoracic spine | Colorectum         | Before                                                                             | 2                                                                                                            | 2                                                                                                            | C                                                                                       | C                                                              | Yes                                       | No                                                                            |
| Male   | 76         | Thoracic spine | Lung               | Before                                                                             | 7                                                                                                            | 10                                                                                                           | D                                                                                       | D                                                              | No                                        | No                                                                            |
| Male   | 61         | Thoracic spine | Lung               | Before                                                                             | No MRI                                                                                                       | 8                                                                                                            | D                                                                                       | C                                                              | No                                        | No                                                                            |
| Female | 68         | Thoracic spine | Lung               | Before                                                                             | 14                                                                                                           | 1                                                                                                            | D                                                                                       | B                                                              | No                                        | No                                                                            |
| Male   | 56         | Thoracic spine | Lung               | Before                                                                             | 1                                                                                                            | 1                                                                                                            | C                                                                                       | C                                                              | No                                        | No                                                                            |
| Female | 67         | Thoracic spine | Lung               | Before                                                                             | 6                                                                                                            | 8                                                                                                            | D                                                                                       | D                                                              | Yes                                       | No                                                                            |
| Male   | 52         | Thoracic spine | Lung               | Before                                                                             | 18                                                                                                           | 2                                                                                                            | D                                                                                       | E                                                              | No                                        | No                                                                            |
| Male   | 61         | Lumbar spine   | Lung               | Before                                                                             | 2                                                                                                            | 3                                                                                                            | D                                                                                       | C                                                              | Yes                                       | Yes                                                                           |
| Male   | 71         | Thoracic spine | Lung               | Before                                                                             | 1                                                                                                            | 2                                                                                                            | D                                                                                       | C                                                              | No                                        | No                                                                            |
| Male   | 65         | Thoracic spine | Multiple myeloma   | Before                                                                             | 2                                                                                                            | 2                                                                                                            | C                                                                                       | C                                                              | Yes                                       | No                                                                            |
| Male   | 77         | Thoracic spine | Prostate           | Before                                                                             | 20                                                                                                           | 21                                                                                                           | D                                                                                       | C                                                              | No                                        | No                                                                            |
| Male   | 88         | Thoracic spine | Prostate           | Before                                                                             | 10                                                                                                           | 3                                                                                                            | D                                                                                       | C                                                              | No                                        | No                                                                            |
| Male   | 58         | Thoracic spine | Prostate           | Before                                                                             | 5                                                                                                            | 5                                                                                                            | D                                                                                       | D                                                              | No                                        | Yes                                                                           |
| Male   | 58         | Lumbar spine   | Prostate           | Before                                                                             | 4                                                                                                            | 5                                                                                                            | D                                                                                       | D                                                              | Yes                                       | No                                                                            |

Table SII. Continued.

| Sex    | Age, years | Location       | Primary tumor site | Period before or after the establishment of the multidisciplinary treatment system | The interval between the recognition of neurological deficits by physicians and MRI scanning, days | The interval between the recognition of neurological deficits by physicians and the start of treatment, days | Neurological deficits at the time of recognition by physicians (Frankel classification) | Neurological deficits after treatment (Frankel classification) | Referral to orthopedists before treatment | The use of BMAs before the recognition of neurological deficits by physicians |
|--------|------------|----------------|--------------------|------------------------------------------------------------------------------------|----------------------------------------------------------------------------------------------------|--------------------------------------------------------------------------------------------------------------|-----------------------------------------------------------------------------------------|----------------------------------------------------------------|-------------------------------------------|-------------------------------------------------------------------------------|
| Male   | 82         | Lumbar spine   | Prostate           | Before                                                                             | 9                                                                                                  | 9                                                                                                            | D                                                                                       | E                                                              | No                                        | No                                                                            |
| Male   | 62         | Thoracic spine | Prostate           | Before                                                                             | 0                                                                                                  | 0                                                                                                            | C                                                                                       | C                                                              | No                                        | No                                                                            |
| Male   | 80         | Thoracic spine | Prostate           | Before                                                                             | 2                                                                                                  | 3                                                                                                            | D                                                                                       | D                                                              | Yes                                       | Yes                                                                           |
| Male   | 74         | Thoracic spine | Prostate           | Before                                                                             | 1                                                                                                  | 1                                                                                                            | C                                                                                       | C                                                              | Yes                                       | No                                                                            |
| Male   | 60         | Thoracic spine | Stomach            | Before                                                                             | 1                                                                                                  | 2                                                                                                            | C                                                                                       | A                                                              | No                                        | No                                                                            |
| Female | 38         | Thoracic spine | Stomach            | Before                                                                             | 1                                                                                                  | 1                                                                                                            | C                                                                                       | A                                                              | No                                        | Yes                                                                           |
| Male   | 47         | Thoracic spine | Stomach            | Before                                                                             | 0                                                                                                  | 0                                                                                                            | D                                                                                       | D                                                              | No                                        | No                                                                            |
| Male   | 71         | Thoracic spine | Stomach            | Before                                                                             | 1                                                                                                  | 1                                                                                                            | A                                                                                       | A                                                              | Yes                                       | No                                                                            |
| Female | 55         | Thoracic spine | Breast             | After                                                                              | 1                                                                                                  | 0                                                                                                            |                                                                                         |                                                                |                                           |                                                                               |
| Female | 61         | Thoracic spine | Breast             | After                                                                              | 0                                                                                                  | 0                                                                                                            |                                                                                         |                                                                |                                           |                                                                               |
| Female | 33         | Thoracic spine | Breast             | After                                                                              | 0                                                                                                  | 0                                                                                                            |                                                                                         |                                                                |                                           |                                                                               |
| Female | 63         | Thoracic spine | Lung               | After                                                                              | 1                                                                                                  | 1                                                                                                            |                                                                                         |                                                                |                                           |                                                                               |
| Female | 59         | Thoracic spine | Lung               | After                                                                              | 0                                                                                                  | 1                                                                                                            |                                                                                         |                                                                |                                           |                                                                               |
| Male   | 83         | Thoracic spine | Lung               | After                                                                              | 0                                                                                                  | 0                                                                                                            |                                                                                         |                                                                |                                           |                                                                               |
| Male   | 71         | Cervical spine | Lung               | After                                                                              | 0                                                                                                  | 0                                                                                                            |                                                                                         |                                                                |                                           |                                                                               |
